# Supplementary material
Source: Springer Nature journal article supplement (https://www.springermedizin.de/resource/supplementary/12958_2008_472_MOESM3_ESM.pdf/9567982)

**(A)**

E0

Day 25

End1

End2

End3

End4

ICAR

CAR

COT

ICAR

CAR

COT

Mr

Latent

Active

72kDa

67kDa

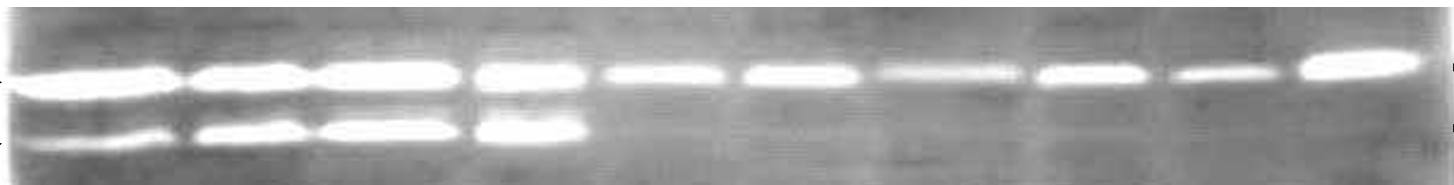**(B)**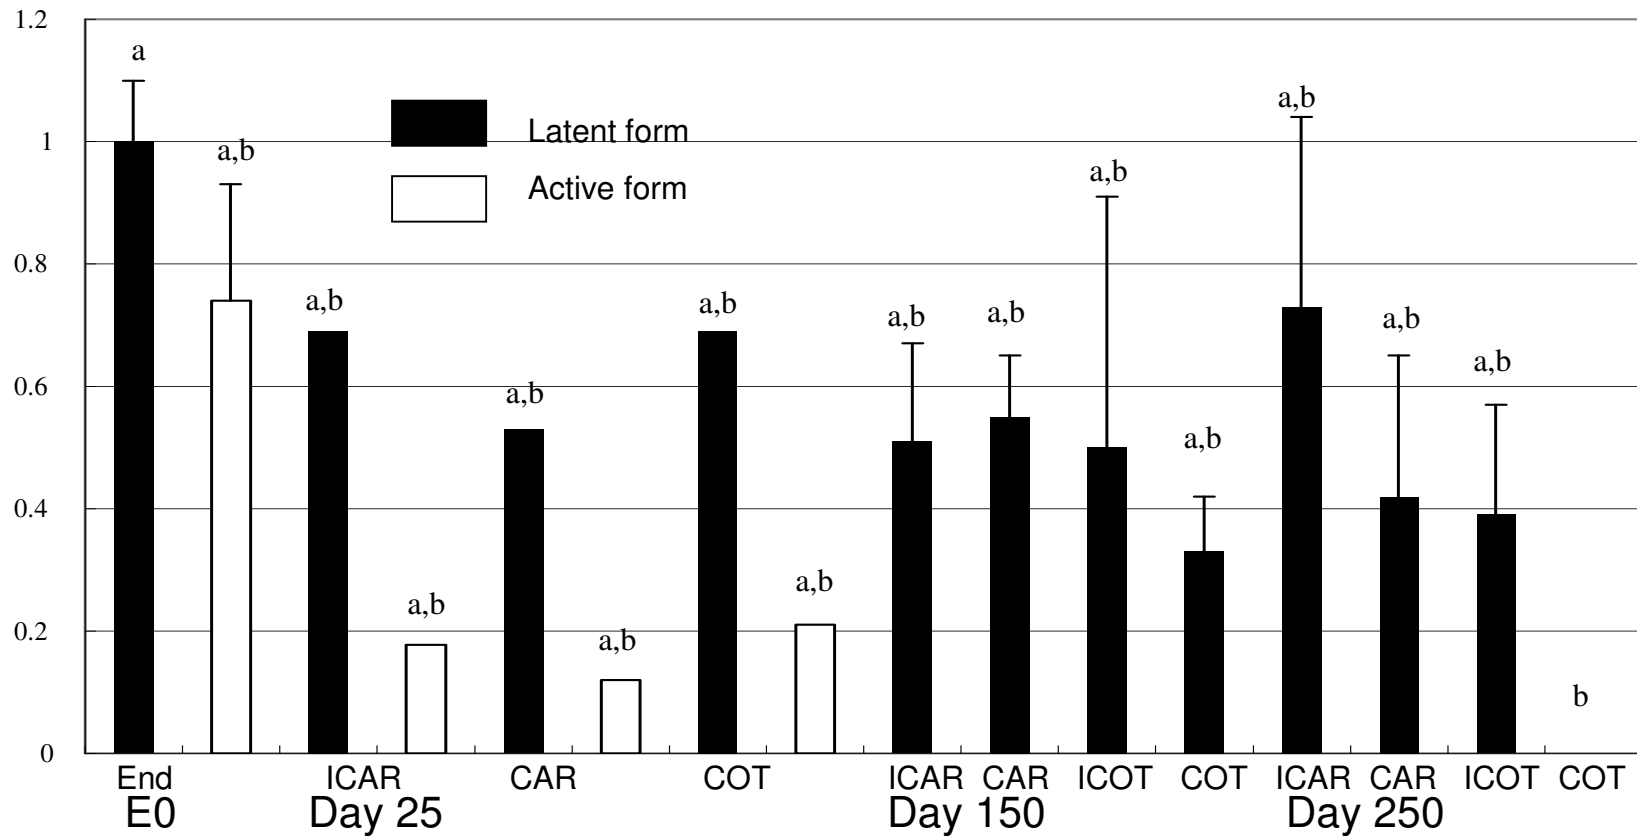

Supplement: MOESM3 [file 9567982]
